# Supplementary material for: DNA methyltransferase inhibition upregulates MHC-I to potentiate cytotoxic T lymphocyte responses in breast cancer
Source: PubMed Central journal article supplement (PMC5770411; doi:10.1038/s41467-017-02630-w), 2018-01-16
Supplement: 41467_2017_2630_MOESM1_ESM.pdf [file 41467_2017_2630_MOESM1_ESM.pdf]

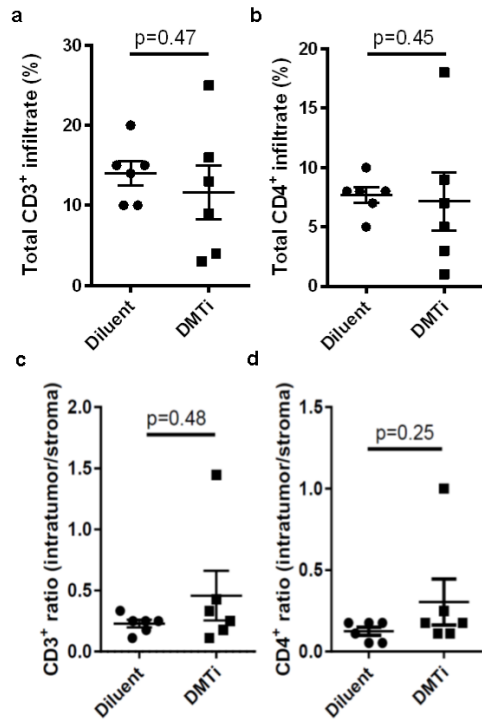

**Supplementary Figure 1: DMTi treatment exerts minimal effects on CD3<sup>+</sup> or CD4<sup>+</sup> infiltration in MMTV-Neu tumors.** Evaluation of CD3<sup>+</sup> (a & c) or CD4<sup>+</sup> (b & d) infiltration in MMTV-Neu tumors by IHC under in vivo administration of Diluent vs DMTi. The result was illustrated as percentage of CD3<sup>+</sup> (a) or CD4<sup>+</sup> (b) over the whole tumor section, or the ratio of CD3<sup>+</sup> (c) or CD4<sup>+</sup> (d) infiltration between intra-tumor and stroma compartments. P-value is calculated using unpaired t test. All data are means + SEM. Each data point represents one mouse.

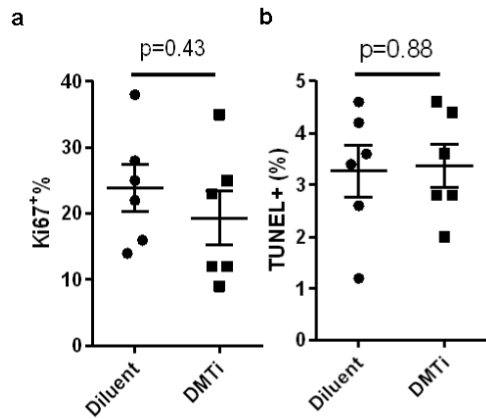

**Supplementary Figure 2: Molecular changes in proliferation and apoptosis in tumors following guadecitabine treatment.** **a.** Ki67 staining and **b.** TUNEL staining in MMTV-Neu tumors 7 days after a single course of guadecitabine therapy. Although not significant, a minor decrease in proliferation was observed following treatment, as assessed by Ki67.

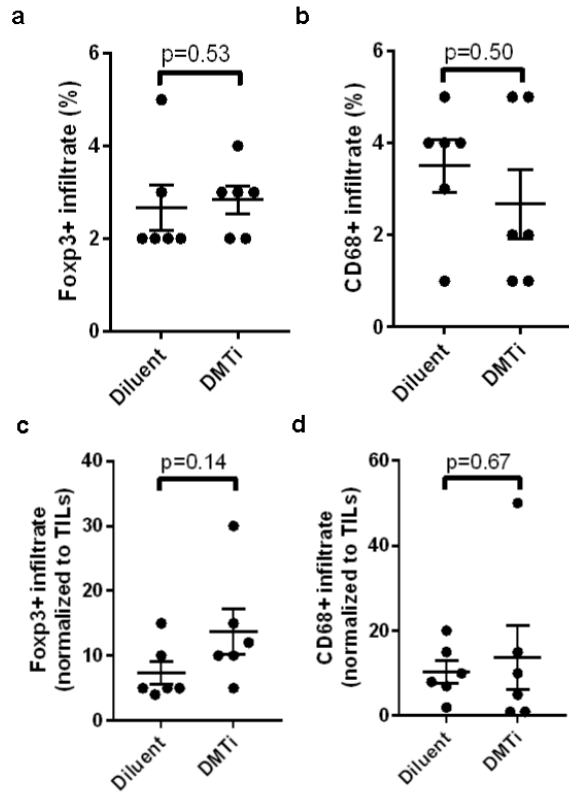

**Supplementary Figure 3: No change in Fxp3+ or CD68+ infiltrate in tumors**

**following guadecitabine treatment.** **a.** Immunohistochemical quantitation of Fxp3+ infiltrate (% of total nuclei in field of view) and **b.** CD68+ infiltrate staining in MMTV-Neu tumors 7 days after a single course of guadecitabine therapy. Markers were also assessed as a percent of total TILs in **c.** and **d.**, respectively. Although not significant, a minor increase in Fxp3+ cells, when assessed as percent of total TILs, was observed following treatment.

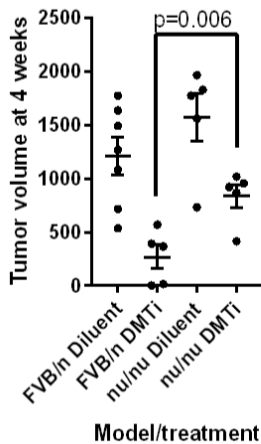

**Supplementary Figure 4: Comparison of guadecitabine efficacy in T cell-deficient and immunocompetent hosts.** MMTV-neu tumors were orthotopically implanted into syngeneic (FVB/n) or athymic nu/nu mice and allowed to reach 100-300mm<sup>3</sup> prior to treatment with diluent control or guadecitabine daily by IP injection for 3 days. Tumor volumes were measured until 4 weeks. Data are expressed as final tumor volume at 4 weeks (or at humane endpoint, if occurring prior to 4 weeks). Although guadecitabine was effective in both models, there was a greater beneficial effect in immunocompetent hosts, suggesting a role for T cell-mediated anti-tumor immunity.

**Supplementary Table 1: Methylated and unmethylated primer sequences for mouse H2-D1**

| <b>Primers</b>         | <b>DNA sequence (5'→3')</b> |
|------------------------|-----------------------------|
| Unmethylated 1 forward | GAGGAGTTTTGGTATATTTTTGTTG   |
| Unmethylated 1 reverse | CCCTTAACCTTTCTATATTTCCCACT  |
| Unmethylated 2 forward | GAGGAGTTTTGGTATATTTTTGTTG   |
| Unmethylated 2 reverse | CCCTTAACCTTTCTATATTTCCCACT  |
| Unmethylated 3 forward | GAGGAGTTTTGGTATATTTTTGTTG   |
| Unmethylated 4 reverse | CCCTTAACCTTTCTATATTTCCCACT  |
| Methylated 1 forward   | GAGGAGTTTCGGTATATTTTTGTC    |
| Methylated 1 reverse   | TAACCCCTAACCTTTCTATATTTCCCG |
| Methylated 2 forward   | AGGAGTTTCGGTATATTTTTGTCG    |
| Methylated 2 reverse   | CCTTAACCTTTCTATATTTCCCGCT   |
| Methylated 3 forward   | GAGGAGTTTCGGTATATTTTTGTC    |
| Methylated 3 reverse   | TAACCCCTAACCTTTCTATATTTCCCG |

**Supplementary Table 2: Primer sequences for qRT-PCR**

| <b>Primers</b>  | <b>DNA sequence (5'→3')</b> |
|-----------------|-----------------------------|
| H2-D1-1 forward | AGGAACCTGCTCGGCTACTA        |
| H2-D1-1 reverse | GCCCTGAACGAAGACCTGAA        |
| H2-D1-2 forward | TACCTGAAGAACGGGAACGC        |
| H2-D1-2 reverse | CCCTGACCTGGCAGTTGAAT        |
| H2-D1-3 forward | AGGTGAAGTCACCCTGAGGT        |
| H2-D1-3 reverse | ATCTGTGGTGGTGCCTCTTG        |
| Gapdh forward   | AGGTCGGTGTGAACGGATTTG       |
| Gapdh reverse   | TGTAGACCATGTAGTTGAGGTCA     |
| Cxcl9 forward   | GGCTCGCAGGGATGATTTCAA       |
| Cxcl9 reverse   | CCAAGTGCTGCCGTCATTTTC       |
| Cxcl10 forward  | GGAGTTTCGAGGAACCCTAGTG      |
| Cxcl10 reverse  | GGGATTTGTAGTGGATCGTGC       |
| Cxcl11 forward  | GGCTTCCTTATGTTCAAACAGGG     |
| Cxcl11 reverse  | GCCGTTACTCGGGTAAATTACA      |
