# Supplementary material for: DNA methyltransferase inhibition upregulates MHC-I to potentiate cytotoxic T lymphocyte responses in breast cancer
Source: PubMed Central journal article supplement (PMC5770411; doi:10.1038/s41467-017-02630-w), 2018-01-16
Supplement: 41467_2017_2630_MOESM3_ESM.pdf [file 41467_2017_2630_MOESM3_ESM.pdf]

## **Description of Additional Supplementary Files**

### **File Name: Supplementary Data 1**

Description: NanoString Pan-Cancer Immune panel normalized transcript count data from MMTV-neu tumors treated with guadecitabine or vehicle control (linear scale).
